# Supplementary material for: The expression of dominant negative TCF7L2 in pancreatic beta cells during the embryonic stage causes impaired glucose homeostasis
Source: PubMed Central journal article supplement — Mol Metab. 2015 Feb 4;4(4):344–52. doi: 10.1016/j.molmet.2015.01.008 (PMC4354927; doi:10.1016/j.molmet.2015.01.008), 2015-02-04

## Supplementary Experimental Procedures

### Genotyping

*βTCFDN* mice were genotyped by PCR for presence of the transgene with the human TCF7L2 forward primer 5'-TCGCCTGGCACCGTAGGACA-3' and reverse primer 5'-GGATGCGGAATGCCCCGTCGT-3' using the Mouse Genotyping Kit (KAPA). The primers for *Ins2-rtTA* genotyping are: Forward, 5-TAGATGTGCTTTACTAAGTCAT-3; Reverse: 5-GAGATCGAGCGGGCCCTCGATG-3.

### The generation of Adenovirus

The wild type human TCF7L2 (TCF7L2WT) and dominant negative TCF7L2 (TCF7L2DN) cDNA sequences were amplified by PCR with the Q5 High-Fidelity DNA Polymerase (New England Biolabs), with primers to append NotI and XhoI restriction sites at the 5' and 3' ends, respectively: TCF7L2WT-F, 5'-CGCGCGGCCGCAAAATGCCGCAGCTGAACG-3'; TCF7L2WT-R, 5'-CGGCTCGAGTTCTAAAGACTTGGTGACGAGC-3'; TCF7L2DN-F, 5'-CGCGCGGCCGCAAAATGGAAACGAATCAAAACAGCTCCTC-3'; TCF7L2DN-R, 5'-CGGCTCGAGTTCTAAAGACTTGGTGACGAGC-3'. The PCR products, purified by the Gel/PCR DNA Extraction Kit (FroggaBio) followed by agarose gel separation, were A-tailed with Taq Polymerase (New England Biolabs) according to the manufacturer's protocol, followed by ligation into the pGEM-T Easy vector (Promega) and routine amplification in *E. coli*. Clones that possess accurate sequences were verified by DNA sequencing (ACGT Corporation, Toronto). The TCF7L2DN and TCF7L2WT were then subcloned into the pShuttle-IRES-hrGFP-2 vector (Agilent Technologies) via the NotI/XhoI sites. The PmeI-linearized TCF7L2WT, TCF7L2DN, and empty shuttle construct (GFP control) were then recombined into the pAdEasy-

1 vector via transformation into BJ5183-AD-1 cells (Agilent Technologies) and subsequent homologous recombination. Recombinant DNA was then amplified in XL10-Gold *E. coli* cells (Agilent Technologies), linearized with PacI (New England Biolabs), then transfected into AD-293 cells, using Lipofectamine 2000 (Life Technologies). Primary virus particles were harvested 3 weeks following transfection through 4 cycles of freeze-thaw and used to further infect AD-293 cells for further amplification. After 3 successive rounds of virus amplification, adenovirus particles were purified using the Vivapure AdenoPACK 20 (Sartorius) and diluted in PBS. Adenovirus titers were determined by taking the absorbance at 260 nm. Virus infection efficiency was monitored by GFP expression.

#### **Glucose stimulated insulin secretion (GSIS) and GLP-1 stimulated insulin secretion**

Ins-1(832/13) cells seeded on a 12-well plate were washed with the KRB buffer (129 mM NaCl, 5 mM NaHCO<sub>3</sub>, 4.8 mM KCl, 1.2 mM KH<sub>2</sub>PO<sub>4</sub>, 1.2 mM MgSO<sub>4</sub>, and 2.5 mM CaCl<sub>2</sub>), followed by the incubation with the KRB buffer with 2.8 mM glucose and 0.1% BSA for 30 min. Insulin secretion from Ins-1 cells was then performed in the KRB buffer containing 2.8 mM or 16.7 mM glucose with or without GLP-1 (7-37) (100 nM) at 37°C in a humidified incubator for 20 min. The supernatants were collected and detected by insulin enzyme immunoassay kit (EMD Millipore, Billerica, MA) according to the manufacturer's instructions. For assessing insulin secretion from mouse islets, ten hand-picked islets were utilized per each assay. The islets were pre-incubated with KRB containing 2.8 mM glucose for 30 min, followed by 20 min incubation with either 2.8 mM or 16.7mM glucose containing KRB, in the presence or absence of 100 nM GLP-1 (7-37). The supernatant fractions were collected for insulin level measurement, as we have reported previously (1).

### **The measurement of $\beta$ -cell and $\alpha$ -cell mass and immunohistochemistry study**

The pancreas was isolated and fixed in 10% paraformaldehyde, dehydrated, and embedded in paraffin. Pancreatic tissue sections were stained for insulin, glucagon, Pdx-1 and Nkx6.1. Pancreatic images were visualized using ScanScope CS (Aperio Technologies) and analyzed by using the ImageScope program (Aperio Technologies) as we described previously (2; 3). Briefly, entire pancreatic tissue areas from each of the pancreatic sections containing 4-6 segments, stained for insulin or glucagon were outlined, and the number of strong positive signals within those areas, representing insulin- or glucagon-positive cells, was determined as the function of the positive pixel count algorithm (Aperio Technologies). This algorithm was also used to detect the number of negative signals, which represented the total pancreatic area. Total  $\beta$ - and  $\alpha$ -cell mass for each pancreas was determined as the product of the total cross-sectional  $\beta$ - or  $\alpha$ -cell areas over total tissue area and the weight of the pancreas before fixation. The following primary antibodies were used: goat anti-Pdx-1 (gift of Dr. Chris Wright, 1:10,000), Nkx6.1 (F55A10-c, DSHB, 1:2000), insulin (Dako, 1:1000). After washing with PBS-Tween, sections were incubated with fluorescence-conjugated secondary antibody for 45 minutes at room temperature. Secondary Antibodies: anti-guinea pig IgG-Alexa 488 (Jackson Immunoresearch), anti-mouse and anti-goat IgG Alexa 647 (Life Technologies). Slides were counterstained with DAPI (Biotium), prior to mounting with fluorescence mounting medium (DAKO). Pdx-1 and Nkx6.1 positive islets cell counting was conducted utilizing the program Imagine Pro Plus.

### **Cell proliferation assay**

Cell proliferation on Ad-TCF7L2WT and Ad-TCF7L2DN infected Ins-1 cells was determined with the MTT method, utilizing the 96 well cell culture plates (4). Approximately 10,000 Ins1

cells were distributed into each well. At indicated time intervals, the cells were incubated with the MTT dye for 1 h. Cell numbers were then determined by colorimetric measurement.

### Supplementary Figure legend

**Figure S1. The establishment of  $\beta$ TCFDN mouse model.** **A)** A schematic of  $P_{TRE3G}$ -TCF7L2DN fusion gene. IRES, internal ribosome entry site. pA, polyadenylation site. rtTA, Tet-On Advanced transactivator. **B-C)** Visualization of mCherry expression by fluorescent microscope (B) and detection of TCF7L2DN expression by Western blotting (C) for Ins-1 cells co-transfected with  $P_{TRE3G}$ -TCF7L2DN and Tet-On3G (i.e. rtTA). **D)** Genotyping results of  $TCF7L2DN_{Tet}$  founders. **E-F)** Detection of mCherry expression in  $\beta$ TCFDN mouse islets (E) and dispersed islet cells (F).

**Figure S2. Inducing TCF7L2DN expression in adult  $\beta$ TCFDN mice generates only modest metabolic defect.** **A)** Western blotting shows the detection of TCF7L2DN in  $\beta$ TCFDN generated by mating  $TCF7L2DN_{Tet}$  founder 4 with  $Ins2$ -rtTA. **B)** TCF7L2DN expression cannot be detected when adult  $\beta$ TCFDN mice were fed with diet that does not contain doxycycline (Doxy). **C)** Reduced endogenous  $TCF7L2$  mRNA expression in  $\beta$ TCFDN islets, assessed by qPCR. **D-E)** The lack of significant defect in  $\beta$ TCFDN mice in response to OGTT and IPITT. **F)** Plasma insulin levels before and 15 min after oral glucose challenge. **G-H)** Assessment of  $\beta$ -cell (**G**) and  $\alpha$ -cell (**H**) mass. **I)** qPCR assessment for a panel of  $\beta$ -cell specific genes. Panel A, B/C, D-H, and I were performed with four sets of mice, respectively. For panels D-F, n=4. For panel C and I, n=3. Mice were fed with Doxycycline (Doxy) at the age of 6 w. The age of mice for each panel were indicated.

**Figure S3. Inducing TCF7L2 expression in  $\beta$ TCFDN mice immediately after weaning generates only modest metabolic defects.** **A)** Body weight comparison at the age of 5 wks. **B)** No significant defect in response to OGTT. **C)** Comparison of blood glucose levels before and 15 min after oral glucose gavage. **D)** Comparison of serum insulin levels before and 15 min after glucose gavage. **E)** Assessment of  $\beta$ -cell mass. For panel A-D, n=4. For panel E, n=3.

### Supplementary Method References

1. Shao W, Wang Z, Ip W, Chiang YT, Xiong X, Chai T, Xu C, Wang Q, Jin T: GLP-1(28-36) improves beta-cell mass and glucose disposal in streptozotocin-induced diabetic mice and activates cAMP/PKA/beta-catenin signaling in beta-cells in vitro. *Am J Physiol Endocrinol Metab* 2013;304:E1263-1272
2. Soltani N, Qiu H, Aleksic M, Glinka Y, Zhao F, Liu R, Li Y, Zhang N, Chakrabarti R, Ng T, Jin T, Zhang H, Lu WY, Feng ZP, Prud'homme GJ, Wang Q: GABA exerts protective and regenerative effects on islet beta cells and reverses diabetes. *Proceedings of the National Academy of Sciences of the United States of America* 2011;108:11692-11697
3. Wang Q, Brubaker PL: Glucagon-like peptide-1 treatment delays the onset of diabetes in 8 week-old db/db mice. *Diabetologia* 2002;45:1263-1273
4. Wang P, Branch DR, Bali M, Schultz GA, Goss PE, Jin T: The POU homeodomain protein OCT3 as a potential transcriptional activator for fibroblast growth factor-4 (FGF-4) in human breast cancer cells. *The Biochemical journal* 2003;375:199-205

**Supplementary Table 1 Nucleotide primers utilized in this study**

|                   |                                                                  | Product (bp) |
|-------------------|------------------------------------------------------------------|--------------|
| Insulin1          | Forward GCAAGCAGGTCATTGTTCCA<br>Reverse CCAAGGTCTGAAGATCCCCG     | 263          |
| Insulin2 (rat)    | Forward GCAAGCAGGTCATTGTTCCA<br>Reverse CTTGTGGGTCCTCCACTTCG     | 209          |
| Insulin 2 (mouse) | Forward CATCAGCAAGCAGGAAGCCTATCT<br>Reverse GCTGGTGCAGCACTGATCT  | 337          |
| Axin2             | Forward TCCTGACCAAACAGACGACG<br>Reverse ACCTCTGCTGCCACAAAAC      | 212          |
| Glp-1r            | Forward GGGTCTCTGGCTACATAAGGA<br>Reverse AAGGATGGCTGAAGCGATGAC   | 178          |
| Gipr              | Forward AACCATCTTGATCAATTTCTCATC<br>Reverse TTTCAAAGGCCAGTTTGGCG | 218          |
| Mafa for mouse    | Forward ACAGAAAGAAGTCGGGTGCG<br>Reverse GCACATTCTGGAGAGCGAGA     | 224          |
| Mafa for rat      | Forward GTATCCATGTCCGTGCGGG<br>Reverse CTTGTACAGGTCCCGCTCCT      | 237          |
| Pdx-1             | Forward CAGTGGGCAGGAGGTGCTTA<br>Reverse TCCACTTCATGCGACGGTTT     | 208          |
| Ngn3              | Forward TCGGGAGAACTAGGATGGCG<br>Reverse GTTTGCTGAGTGCCAACTCG     | 252          |
| Isl-1             | Forward TGAGGGTTTCTCCGGATTTG<br>Reverse TGAAGCCTATGCTGCACTTG     | 171          |
| Tcf712 (mouse)    | Forward GCATCCCTCACCCGGCCATC<br>Reverse GCCACCTGCGCCCGAGAATC     | 243          |
| Gapdh (rat)       | Forward AGCTCATTTCTGGTATGACAA<br>Reverse GGTATTCGAGAGAAGGGAGGG   | 258          |
| Gapdh (mouse)     | Forward GACCACAGTCCATGCCATCA<br>Reverse TGAAGTCGCAGGAGACAACC     | 335          |

**Supplementary Figure 1**

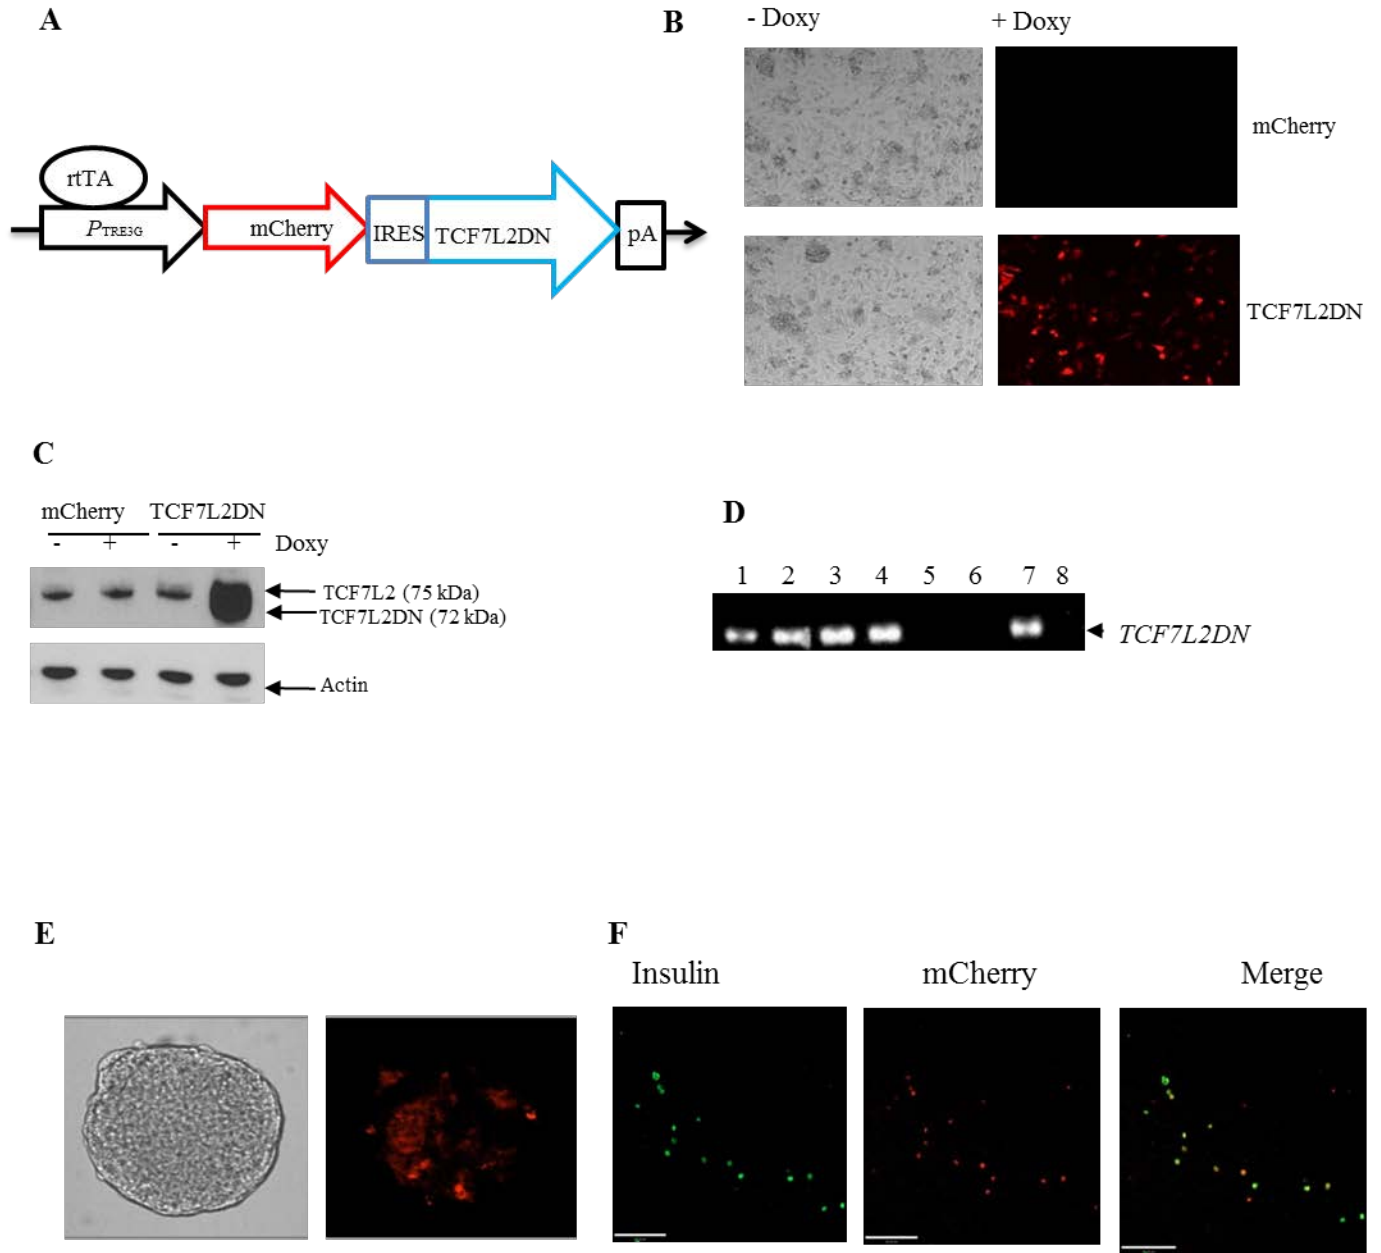

## Supplementary Figure 2

**A (8w)**

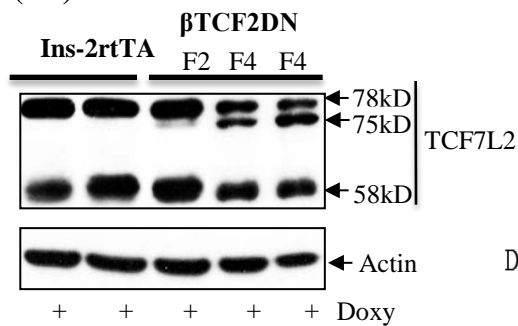

**B (8w)**

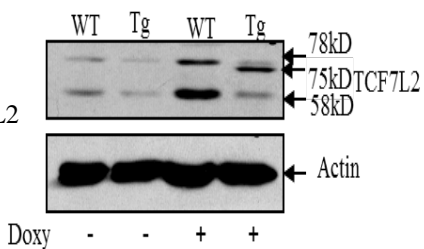

**C (8w)**

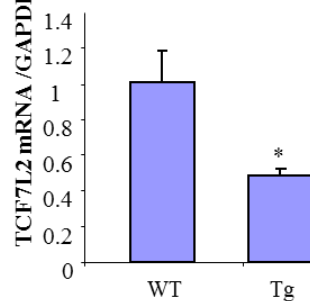

**D OGTT (8w)**

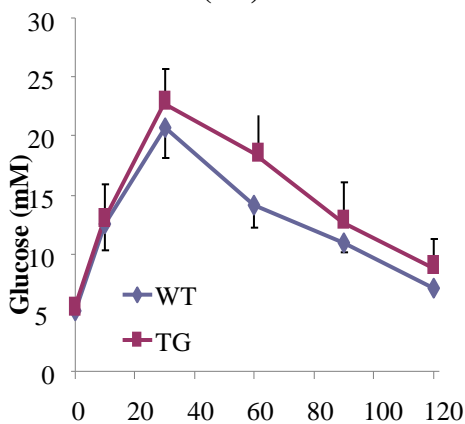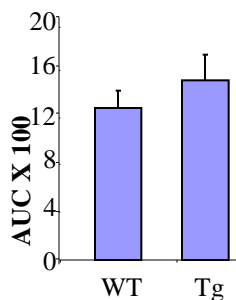

**E IPITT (9w)**

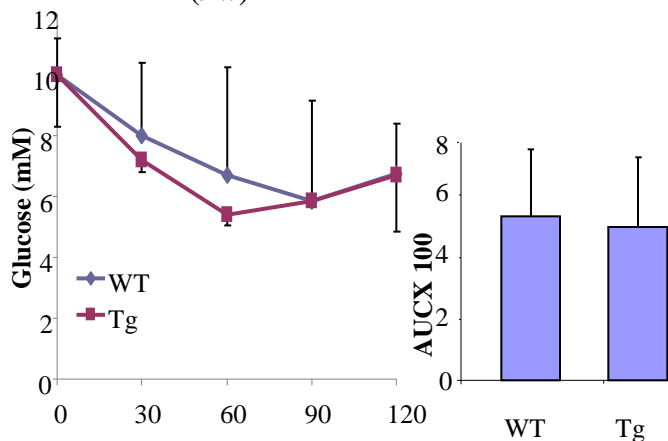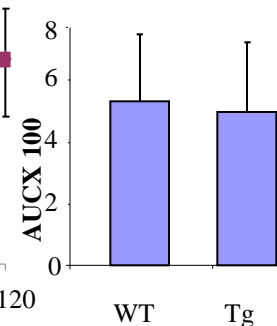

**F (8w)**

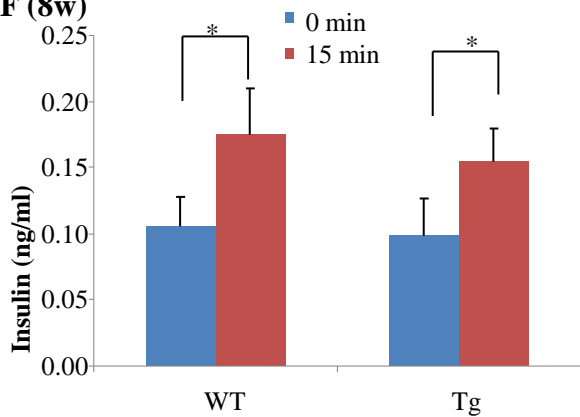

**G (8w)**

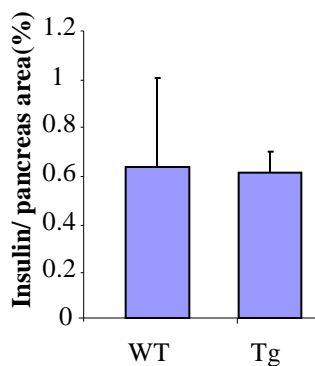

**H (8w)**

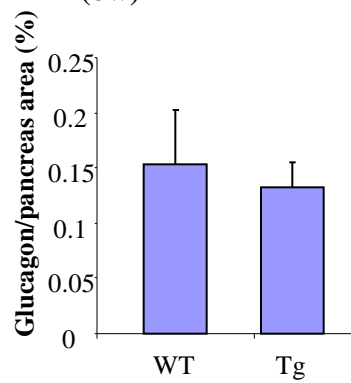

**I (9w)**

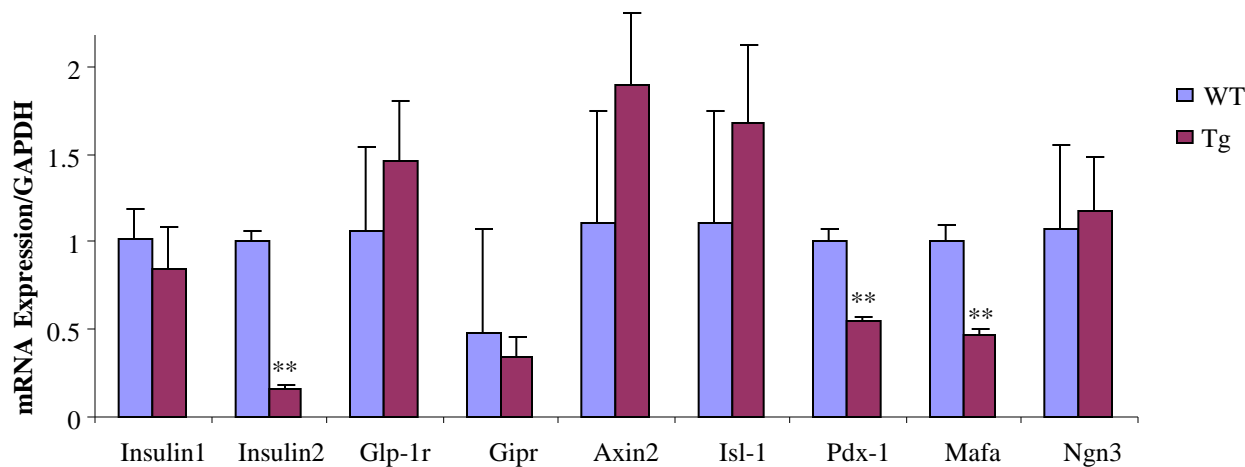



# Supplementary Figure 3

## A. Body Weight (6w)

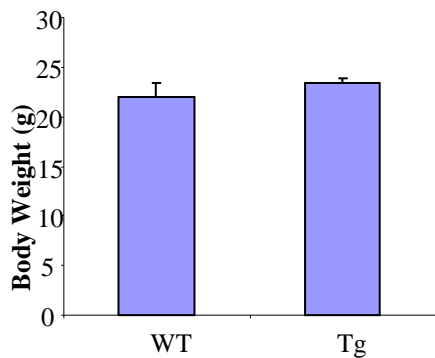

## B. OGTT (6w)

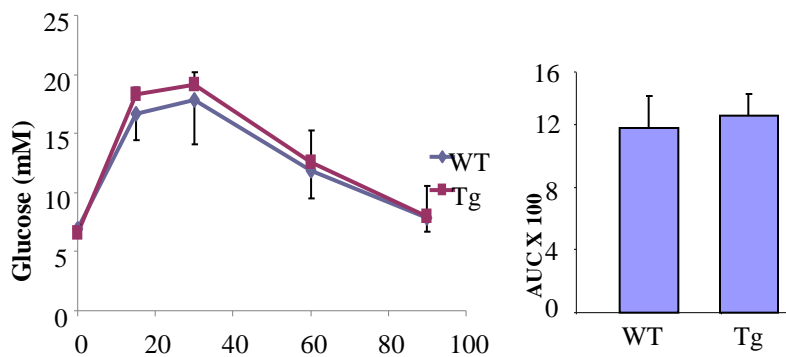

## C (6w)

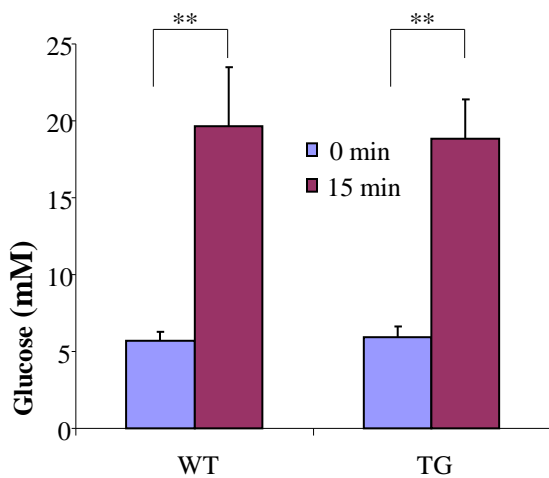

## D (6w)

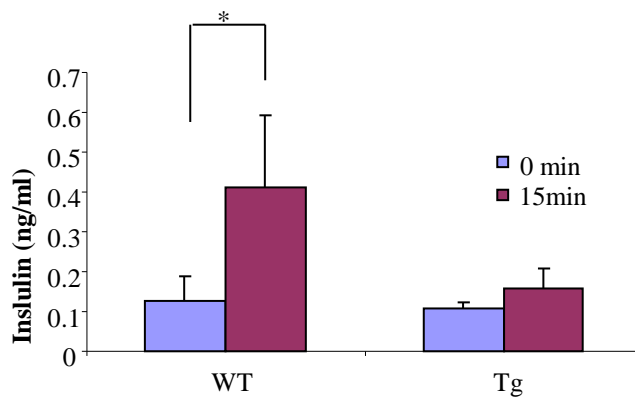

## E (7w)

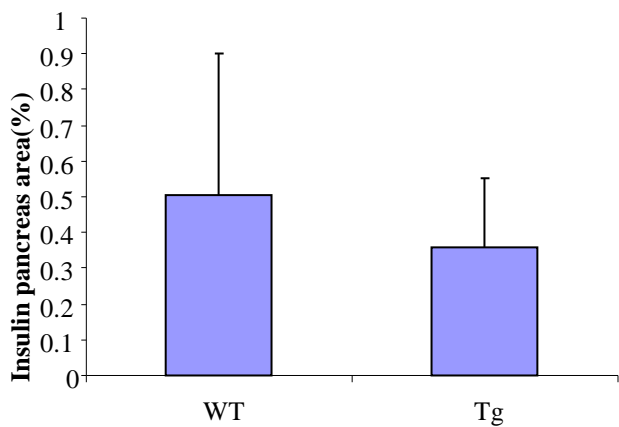

Supplement: mmc1.pdf [file mmc1.pdf]
